# Supplementary material for: Real-World Evidence Study of Patients with KRAS-Mutated NSCLC in Finland
Source: MDPI journal article supplement (doi:10.3390/curroncol31050205), 2024-05-11
Supplement: s1 [file s1]

## Supplemental material

**ICD-10 codes for NSCLC:** C34.01- C34.05, C34.09, C34.11-C34.15, C34.19, C34.21- C34.25, C34.29, C34.31-C34.35, C34.39 C34.81-C34.85, C34.89, C34.91-C34.95, C34.99

**mSNOMED-codes for NSCLC:** M80703, M81403, M80123, M85603, M80103

| Variable                     |                       | N   | Hazard ratio                                                                        | p                         |
|------------------------------|-----------------------|-----|-------------------------------------------------------------------------------------|---------------------------|
| <b>Age</b>                   |                       | 379 |    | 0.99 (0.98, 1.01) 0.390   |
| <b>Sex</b>                   | Male                  | 188 |    | Reference                 |
|                              | Female                | 191 |    | 0.87 (0.67, 1.14) 0.306   |
| <b>CCI</b>                   | 0                     | 263 |    | Reference                 |
|                              | 1-2                   | 100 |    | 1.05 (0.76, 1.45) 0.767   |
|                              | 3-4                   | 10  |    | 0.45 (0.18, 1.14) 0.092   |
|                              | 5-                    | 6   |  | 1.90 (0.79, 4.57) 0.150   |
| <b>Molecular alterations</b> | Other driver mutation | 66  |  | Reference                 |
|                              | KRAS G12C             | 35  |  | 1.75 (1.01, 3.04) 0.048   |
|                              | No driver mutation    | 205 |  | 0.98 (0.65, 1.46) 0.907   |
|                              | Other KRAS            | 73  |  | 1.09 (0.69, 1.72) 0.718   |
| <b>Smoking</b>               | Never smoked          | 15  |  | Reference                 |
|                              | Previous smoker       | 165 |  | 1.16 (0.55, 2.45) 0.690   |
|                              | Smoker                | 199 |  | 1.04 (0.49, 2.23) 0.920   |
| <b>Treated</b>               | yes                   | 212 |  | Reference                 |
|                              | no                    | 167 |  | 2.46 (1.81, 3.36) <0.001  |
| <b>Performance status</b>    | 0-1                   | 171 |  | Reference                 |
|                              | 2                     | 51  |  | 1.74 (1.15, 2.63) 0.009   |
|                              | 3-4                   | 35  |  | 3.56 (2.19, 5.80) <0.001  |
|                              | Unknown               | 122 |  | 1.69 (1.18, 2.43) 0.004   |
| <b>Stage</b>                 | I-II                  | 26  |  | Reference                 |
|                              | III                   | 108 |  | 1.37 (0.64, 2.94) 0.414   |
|                              | IV                    | 125 |  | 5.33 (2.52, 11.25) <0.001 |
|                              | Unknown               | 120 |  | 6.02 (2.87, 12.63) <0.001 |

**Supplemental Figure S1.** Cox model for OS including also treatment status, performance status, and tumor stage as covariates. The proportional hazard assumptions were violated for these additional covariates and thus, the hazard ratios represent an average risk over time.

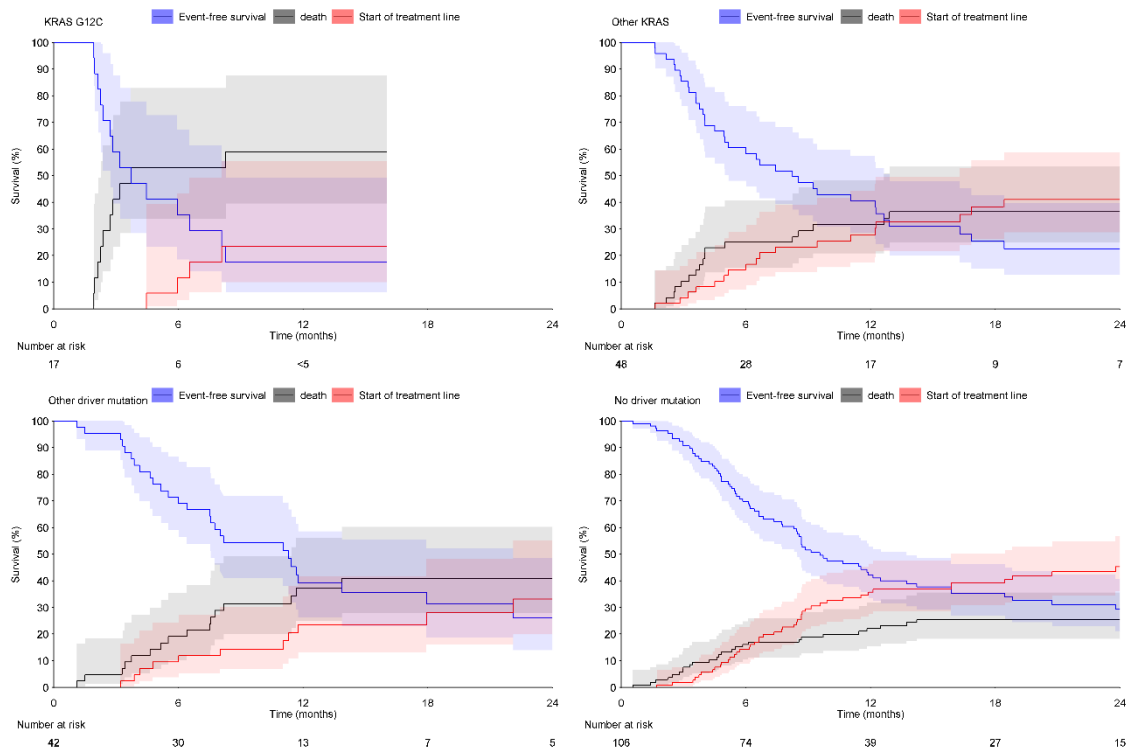

**Supplemental Figure S2.** Time to next treatment of the first treatment line by *KRAS* subgroups using a competing risk model (death as competing risk). Event-free survival (blue curve) indicates the composite event of start of the next treatment line and death. Median TTNT from the event-free survival: *KRAS* G12C 2.8 months (95% CI 1.2-5.2), other *KRAS* 6.9 months (95% CI 3.4-10.4), other driver mutation 10.1 months (95% CI 5.7-16.5), no driver mutations 7.9 months (95% CI 6.3-11.1).
